# Supplementary material for: Harnessing CRISPR/Cas9 for Enhanced Disease Resistance in Hot Peppers: A Comparative Study on CaMLO2-Gene-Editing Efficiency across Six Cultivars
Source: MDPI journal article supplement (doi:10.3390/ijms242316775), 2023-11-26
Supplement: s1 [file s1]

# **Harnessing CRISPR/Cas9 for Enhanced Disease Resistance in Hot Pepper: A Comparative Study on *CaMLO2*-Gene-Editing Efficiency across six cultivars**

Jae-Hyeong Park<sup>1</sup> and Hyeran Kim<sup>1,2,\*</sup>

**Supplementary Data**

**Table S1.** Primers used in Sanger sequencing or targeted deep sequencing or sgRNA synthesis. The primary primer pair used for targeted deep sequencing was the same as that used for Sanger sequencing analysis.

| Primer Name                  | Sequence                     |
|------------------------------|------------------------------|
| <i>CaMLO2</i> F              | 5'-ATGGCTAAAGAACGGTCGAT-3'   |
| <i>CaMLO2</i> R              | 5'-ATGGAGCTGGTGTATTGCAT-3'   |
| <i>CaMLO2</i> F1 (primary F) | 5'-TGGGATTCATATCATTTGTGTG-3' |
| <i>CaMLO2</i> R1 (primary R) | 5'-CCGAATGTGTCTCAGCCTTT-3'   |
| sgRNA1 (without PAM)         | 5'-ACATCTTCATCTGCCTTACA-3'   |
| sgRNA2 (without PAM)         | 5'-TGATGACCCTTGTTTACAAA-3'   |

| D21101               |                               |    | D21102               |                             |     | E21301               |                              |    |
|----------------------|-------------------------------|----|----------------------|-----------------------------|-----|----------------------|------------------------------|----|
| CaMLO2 sgRNA 1 Locus |                               |    | CaMLO2 sgRNA 1 Locus |                             |     | CaMLO2 sgRNA 1 Locus |                              |    |
| 1st                  | CCTTGTGAAGGCAGATGAAGATGTCAA   | WT | 1st                  | CCTTGT-AAGGCAGATGAAGATGTCAA | WT  | 1st                  | CCTTGTGAAGGCAGATGAAGATGTCAA  | WT |
|                      | CCTTGT---GCAGATGAAGATGTCAA    | -2 |                      | CCTTGT--AGGCAGATGAAGATGTCAA | -1  |                      | CCTTGT---GCAGATGAAGATGTCAA   | -3 |
|                      | CCTTGT-----AGATGAAGATGTCAA    | -5 |                      | CCTTGTaAAGGCAGATGAAGATGTCAA | +1  |                      | CCTTGT--AGGCAGATGAAGATGTCAA  | -1 |
|                      | CCTTGT-AGGCAGATGAAGATGTCAA    | -1 |                      | CCTTGT-----AGATGAAGATGTCAA  | -5  |                      | CCTTGT--GGCAGATGAAGATGTCAA   | -2 |
| 2nd                  | CCTTGT----CAGATGAAGATGTCAA    | -4 | 2nd                  | CCTTGT----GCAGATGAAGATGTCAA | -3  | 2nd                  | CCTTGT-AGGCAGATGAAGATGTCAA   | -1 |
|                      | CCTTGT---GCAGATGAAGATGTCAA    | -3 |                      | CCTTGT--AGGCAGATGAAGATGTCAA | -1  |                      | CCTTGT---GCAGATGAAGATGTCAA   | -3 |
|                      | CCTTGT-AGGCAGATGAAGATGTCAA    | -1 |                      | CCTTGT--GGCAGATGAAGATGTCAA  | -2  |                      | CCTTGT--GGCAGATGAAGATGTCAA   | -2 |
| 3rd                  | CCTTGT---GCAGATGAAGATGTCAA    | -3 | 3rd                  | CCTTGT---GCAGATGAAGATGTCAA  | -3  | 3rd                  | CCTTGT-AGGCAGATGAAGATGTCAA   | -1 |
|                      | CCTTGT--AGGCAGATGAAGATGTCAA   | -1 |                      | CCTTGT--AGGCAGATGAAGATGTCAA | -1  |                      | CCTTGTA--GCAGATGAAGATGTCAA   | -2 |
|                      | CCTTGT--GGCAGATGAAGATGTCAA    | -2 |                      | CCTTGT--GGCAGATGAAGATGTCAA  | -2  |                      | CCTTGT---GCAGATGAAGATGTCAA   | -3 |
| 4th                  | CCTTGT--GGCAGATGAAGATGTCAA    | -2 | 4th                  | CCTTGT--GGCAGATGAAGATGTCAA  | -2  | 4th                  | CCTTGT---GCAGATGAAGATGTCAA   | -3 |
|                      | CCTTGT-----TGAAGATGTCAA       | -8 |                      | CCTTGT-----TGAAGATGTCAA     | -9  |                      | CCTTGT-AGGCAGATGAAGATGTCAA   | -1 |
|                      | CCTTGT---GCAGATGAAGATGTCAA    | -3 |                      | CCTTGT-----AGATGAAGATGTCAA  | -5  |                      | CCTTGT--GGCAGATGAAGATGTCAA   | -2 |
| 5th                  | CCTTGT--GGCAGATGAAGATGTCAA    | -2 |                      |                             |     |                      |                              |    |
|                      | CCTTGT---GCAGATGAAGATGTCAA    | -3 |                      |                             |     |                      |                              |    |
|                      | CCTTGT-AGGCAGATGAAGATGTCAA    | -1 |                      |                             |     |                      |                              |    |
| CaMLO2 sgRNA 2 Locus |                               |    | CaMLO2 sgRNA 2 Locus |                             |     | CaMLO2 sgRNA 2 Locus |                              |    |
| 1st                  | GTATGATGACCCCTGTTTACAAAGG     | WT | 1st                  | GTATGATGACCCCTGTTTACAAAGG   | WT  | 1st                  | GTATGATGACCCCTGTTTAC-AAAAGG  | WT |
|                      | GTATGATGACCCCTGT---CAAAAGG    | -3 |                      | GTATGATG-----CAAAAGG        | -11 |                      | GTATGATGACCCCTGTTTAC--AAAGG  | -1 |
|                      | GTATGATGACCCCTGTTTAC-AAAGG    | -1 |                      | GTATGATGACCCCTGTTTAC-AAAGG  | -1  |                      | GTATGATGACCCCTGTTTACaAAAAGG  | +1 |
| 2nd                  | GTATGATGACCCCTGTTTAC-AAAGG    | -1 |                      |                             |     |                      |                              |    |
| E21302               |                               |    | F21201               |                             |     | J21401               |                              |    |
| CaMLO2 sgRNA 1 Locus |                               |    | CaMLO2 sgRNA 1 Locus |                             |     | CaMLO2 sgRNA 1 Locus |                              |    |
| 1st                  | CCTTGT-AAGGCAGATGAAGATGTCAA   | WT | 1st                  | CCTTGT-AAGGCAGATGAAGATGTCAA | WT  | 1st                  | CCTTGT-AAGGCAGATGAAGATGTCAA  | WT |
|                      | CCTTGT---GCAGATGAAGATGTCAA    | -3 |                      | CCTTGT--AGGCAGATGAAGATGTCAA | -1  |                      | CCTTGT---GCAGATGAAGATGTCAA   | -3 |
|                      | CCTTGT--AGGCAGATGAAGATGTCAA   | -1 |                      | CCTTGT---GCAGATGAAGATGTCAA  | -3  |                      | CCTTGT--GGCAGATGAAGATGTCAA   | -2 |
|                      | CCTTGT---GGCAGATGAAGATGTCAA   | -2 |                      | CCTTGT-----CAGATGAAGATGTCAA | -4  |                      | CCTTGT--AGGCAGATGAAGATGTCAA  | -1 |
| 2nd                  | CCTTGTaAAGGCAGATGAAGATGTCAA   | +1 | 2nd                  | CCTTGT-----AGATGAAGATGTCAA  | -5  | 2nd                  | CCTTGT---GGCAGATGAAGATGTCAA  | -2 |
|                      | CCTTGT---GCAGATGAAGATGTCAA    | -3 |                      | CCTTGT-A--GCAGATGAAGATGTCAA | -2  |                      | CCTTGT-----AGATGAAGATGTCAA   | -5 |
|                      | CCTTGT-----CAGATGAAGATGTCAA   | -4 |                      | CCTTGT---GCAGATGAAGATGTCAA  | -3  |                      | CCTTGT--AGGCAGATGAAGATGTCAA  | -1 |
| 3rd                  | CCTTGT---GCAGATGAAGATGTCAA    | -3 | 3rd                  | CCTTGT---GCAGATGAAGATGTCAA  | -3  | 3rd                  | CCTTGTaAAGGCAGATGAAGATGTCAA  | +1 |
|                      | CCTTGT--AGGCAGATGAAGATGTCAA   | -1 |                      | CCTTGT--AGGCAGATGAAGATGTCAA | -1  |                      | CCTTGT--AGGCAGATGAAGATGTCAA  | -1 |
|                      | CCTTGT--GGCAGATGAAGATGTCAA    | -2 |                      | CCTTGT--GGCAGATGAAGATGTCAA  | -2  |                      | CCTTGT---GGCAGATGAAGATGTCAA  | -2 |
| 4th                  | CCTTGTaAAGGCAGATGAAGATGTCAA   | +1 | 4th                  | CCTTGT---GCAGATGAAGATGTCAA  | -3  | 4th                  | CCTTGT--AGGCAGATGAAGATGTCAA  | -1 |
|                      | CCTTGT-----CAGATGAAGATGTCAA   | -4 |                      | CCTTGT--AGGCAGATGAAGATGTCAA | -1  |                      | CCTTGT---GGCAGATGAAGATGTCAA  | -2 |
|                      | CCTTGT---GGCAGATGAAGATGTCAA   | -2 |                      | CCTTGT--GGCAGATGAAGATGTCAA  | -2  |                      | CCTTGT-----GCAGATGAAGATGTCAA | -3 |
| 5th                  | CCTTGTaAAGGCAGATGAAGATGTCAA   | +1 | 5th                  | CCTTGT---GCAGATGAAGATGTCAA  | -3  |                      |                              |    |
|                      | CCTTGT-----CAGATGAAGATGTCAA   | -3 |                      | CCTTGTaAAGGCAGATGAAGATGTCAA | +1  |                      |                              |    |
|                      | CCTTGT-----GATGAAGATGTCAA     | -7 |                      | CCTTGT--GGCAGATGAAGATGTCAA  | -2  |                      |                              |    |
| CaMLO2 sgRNA 2 Locus |                               |    | CaMLO2 sgRNA 2 Locus |                             |     | CaMLO2 sgRNA 2 Locus |                              |    |
| 1st                  | GTATGATGACCCCTGTTTAC---AAAAGG | WT | 1st                  | GTATGATGACCCCTGTTTAC-AAAAGG | WT  | 1st                  | GTATGATGACCCCTGTTTACAAAGG    | WT |
|                      | GTATGATGACCCCTGTTTACcggAAAAGG | +3 |                      | GTATGATGACCCCTGTTTAC--AAAGG | -1  |                      | GTATGATGACCCCTGT---CAAAAGG   | -3 |
|                      | GTATGATGACCCCTGTTTAC---AAAGG  | -1 |                      | GTATGATGACCCCTGTTTACaAAAAGG | +1  |                      | GTATGATGACCCCTGTTTAC-AAAGG   | -1 |
| 2nd                  | GTATGATGACCCCTGTTTAC---AAAGG  | -1 | 2nd                  | GTATGATGACCCCT---C-AAAAGG   | -6  | 2nd                  | GTATGATGACCCCTGTTTAC-AAAGG   | -1 |
|                      | GTATGATGACCCCTGTTTACa--AAAAGG | +1 |                      | GTATGATGACCCCT---C-AAAAGG   | -7  |                      |                              |    |
|                      | GTATGATGACCCCTGTTTACa--AAAAGG | +1 |                      | GTATGATGACCCCTGT---C-AAAAGG | -3  |                      |                              |    |
| 3rd                  | GTATGATGAC---C---AAAAGG       | -9 | 3rd                  | GTATGATGACCCCTGT---C-AAAAGG | -3  |                      |                              |    |
|                      | GTATGATGACCCCTGT---C---AAAAGG | -3 |                      | GTATGATGACCCCTGTTTAC-AAAGG  | -1  |                      |                              |    |
|                      | GTATGATGACCCCTGTT---AAAAGG    | -3 |                      |                             |     |                      |                              |    |

**Figure S1.** The top 3-ranked *CaMLO2* editing patterns of all biological replicates of six commercial hot pepper cultivars. Red letter, PAM sequences; blue letter, CRISPR target (sgRNA) sequence; red hyphen (-), deleted nucleotide; red small letters (+), inserted nucleotide.

**Table S2.** Primers used in targeted deep sequencing for off target (OT) analysis.

| Primer Name | Sequence                      |
|-------------|-------------------------------|
| OT1 F       | 5'-GTCATATGGGTGCATAGTGAGAC-3' |
| OT1 R       | 5'-ATCACGATCAGCAGTCCATGA-3'   |
| OT1 F1      | 5'-TTCATTAACCTATCGCACTCC-3'   |
| OT1 R1      | 5'-GGTCCCAGAACAGTATCCA-3'     |
| OT2 F       | 5'-CACTATCTCAAGAAGCTCTGCC-3'  |
| OT2 R       | 5'-AATTGATGGGAAGAAGAGTGTGT-3' |
| OT2 F1      | 5'-AAGAACCAAACACATAGAGAAGA-3' |
| OT2 R1      | 5'-CCTACTTGAGCTGGAAACC-3'     |
| OT3 F       | 5'-TGTGGTTCAGAAATTGTGCGAG-3'  |
| OT3 R       | 5'-GGGTCAAAAAGCACGTCACC-3'    |
| OT3 F1      | 5'-GCAATCCTCCAAATAACCCCT-3'   |
| OT3 R1      | 5'-TGAATCCTCAAAACCCAAGAA-3'   |
| OT4 F       | 5'-GAGTTTGTAGTGGTTTAAATGGT-3' |
| OT4 R       | 5'-CCACGGGATATAGGGGTCTA-3'    |
| OT4 F1      | 5'-CATGCAAGGTAAACGGGAAT-3'    |
| OT4 R1      | 5'-GCAAGCAATGTCTTTAGTAAACC-3' |
| OT5 F       | 5'-CACTAAGCCCAAGTCTGATGTAC-3' |
| OT5 R       | 5'-GCTCATCCACCAAGTACTCTC-3'   |
| OT5 F1      | 5'-ACGCTCTCAGATTGGCTAG-3'     |
| OT5 R1      | 5'-CGAAATAGGCCTCACACGG-3'     |
| OT6 F       | 5'-GAAACGAGGAGAAGAATGGATGC-3' |
| OT6 R       | 5'-CACATTCTTTTGCTGTCTCTTCC-3' |
| OT6 F1      | 5'-TGGTTCCACCACAAGGAGAT-3'    |
| OT6 R1      | 5'-ACTGAAGGCGCTTGTAC-3'       |

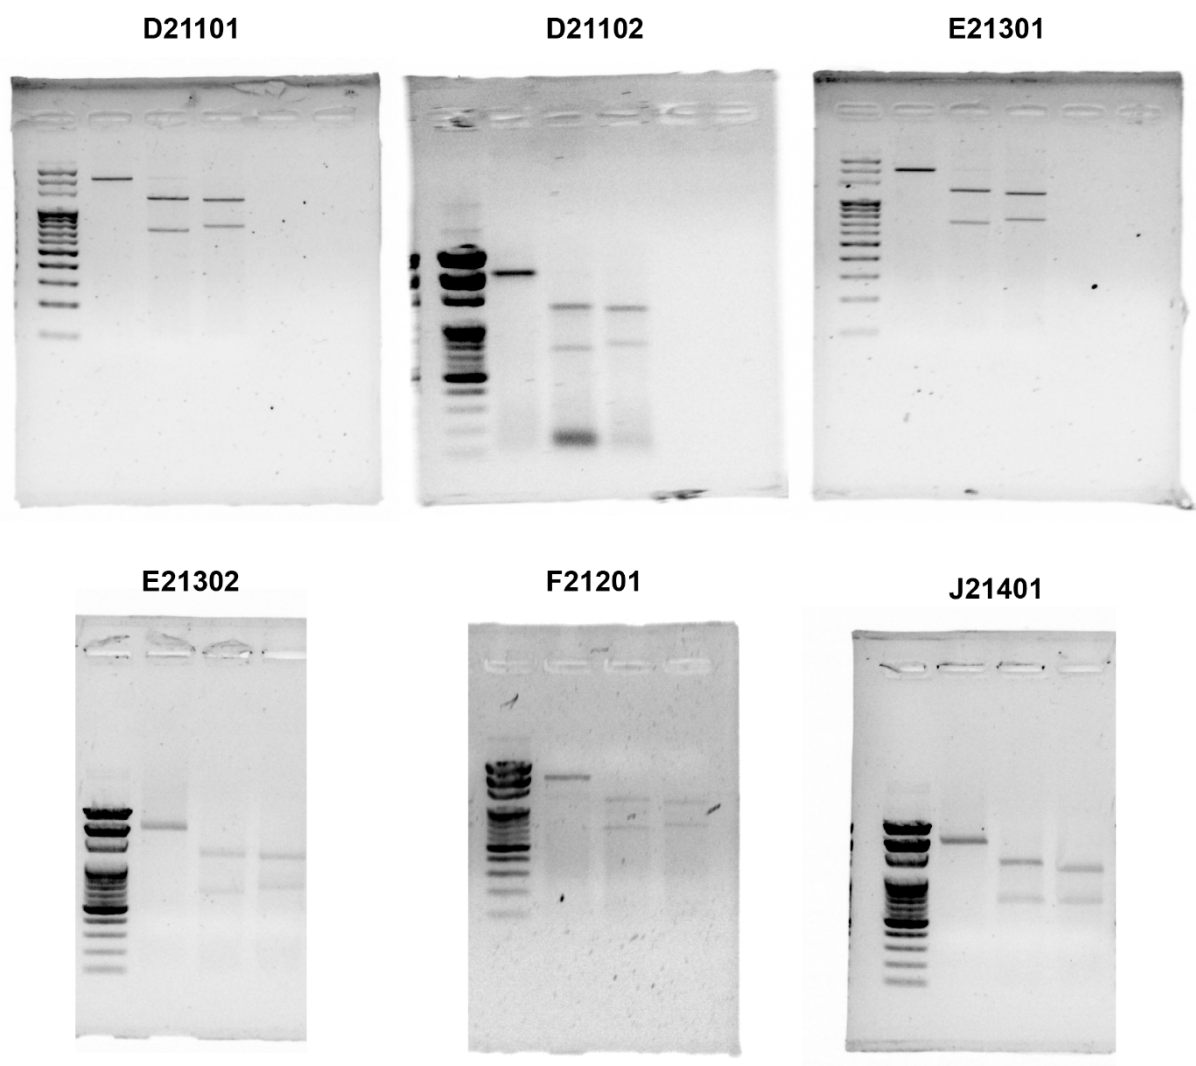

**Figure S2.** The original Gels of Figure 2.
